# Supplementary material
Source: PubMed Central journal article supplement (PMC11028940)
Supplement: 262_2017_2004_MOESM1_ESM.pdf [file 262_2017_2004_MOESM1_ESM.pdf]

## Supplementary Data

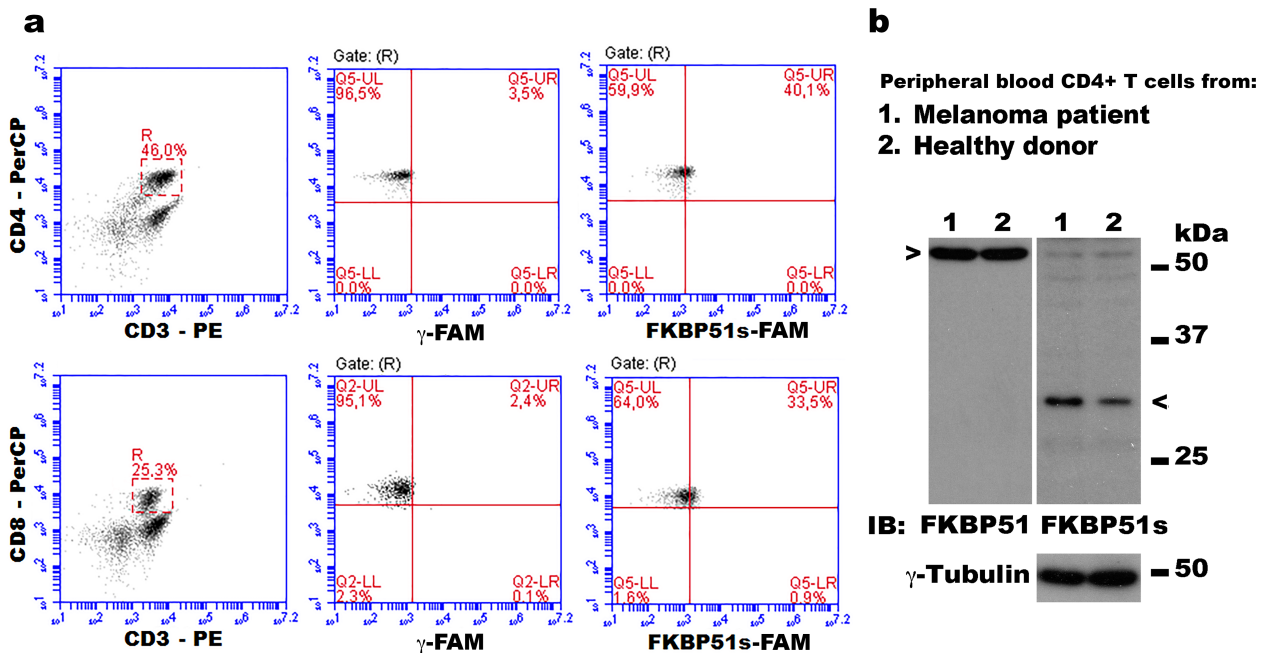

Supplementary figure 1

**Supplementary figure 1a.** *Lymphocyte CD3/CD4/FKBP51s and CD3/CD8/FKBP51s measurements.* FSC/SSC-gated lymphocytes were plotted on CD3/CD4 or CD3/CD8 axes to determine the percentage of CD4 and CD8 T lymphocytes (R value, CD3 plot). Then, R gated cells was plotted to measure the proportion of FKBP51s<sup>pos</sup> cells (value in UR quadrant, FKBP51s plot). Finally, the percentage of CD3/CD4/FKBP51s and CD3/CD8/FKBP51s cells were calculated as follows: R-value (CD3 plot)  $\times$  UR value (FKBP51s plot) / 100). **b.** *Western Blot assay of FKBP51s in CD4 lymphocytes.* CD4<sup>+</sup> lymphocytes were sorted from the PBMCs of a melanoma patient (1) and a control donor (2) (CD4<sup>+</sup>>98%). Then, total lysates were obtained and subjected to Western blotting. The anti-FKBP51s antibody recognizes a band at ~30 kDa but not the canonical FKBP51.

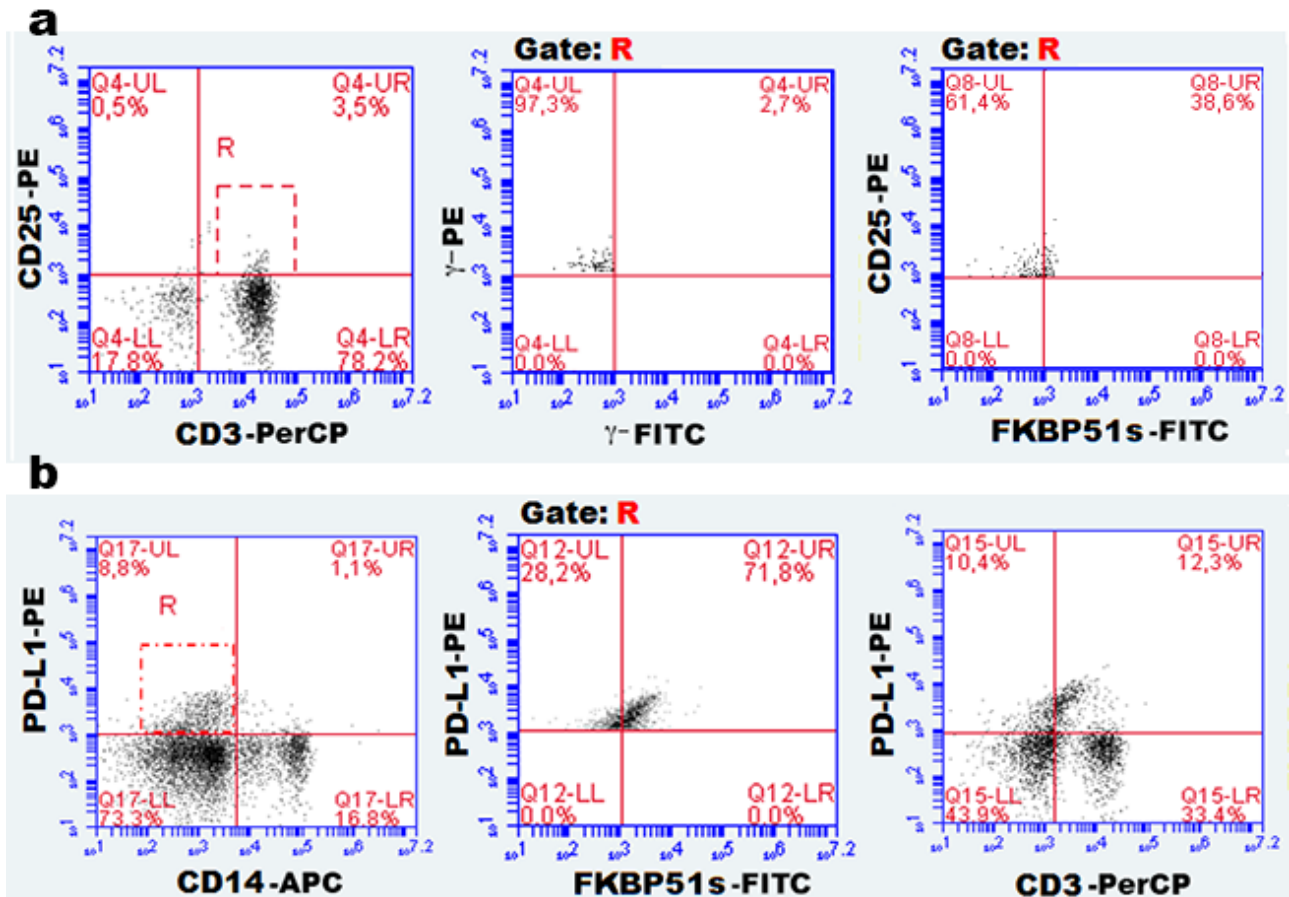

Supplementary figure2

**Supplementary figure 2.** *Lymphocytes CD25/FKBP51s and PD-L1/FKBP51s measurements.* **a**, FSC/SSC-gated lymphocytes were plotted according to CD3/CD25 to determine the percentage of CD25 T lymphocytes (R-value, CD3 plot). Then, R gated cells were plotted to measure the proportion of FKBP51s<sup>pos</sup> cells. The percentage of CD25/FKBP51s cells was calculated as follows: R-value (CD3 plot) × UR value (FKBP51s plot) / 100. **b**, PBMCs were plotted according to CD14/PD-L1 to determine the percentage of PD-L1<sup>pos</sup> lymphocytes (R value, CD14 plot). Then, R gated cells were plotted to measure the proportion of FKBP51s<sup>pos</sup> cells. The percentage of PD-L1/FKBP51s cells was calculated as follows: R-value (CD14 plot) × UR value (FKBP51s) / 100. The PD-L1<sup>pos</sup> lymphocyte count was calculated using a CD14 negative population because of low CD3 expression (CD3<sup>Dim</sup>).

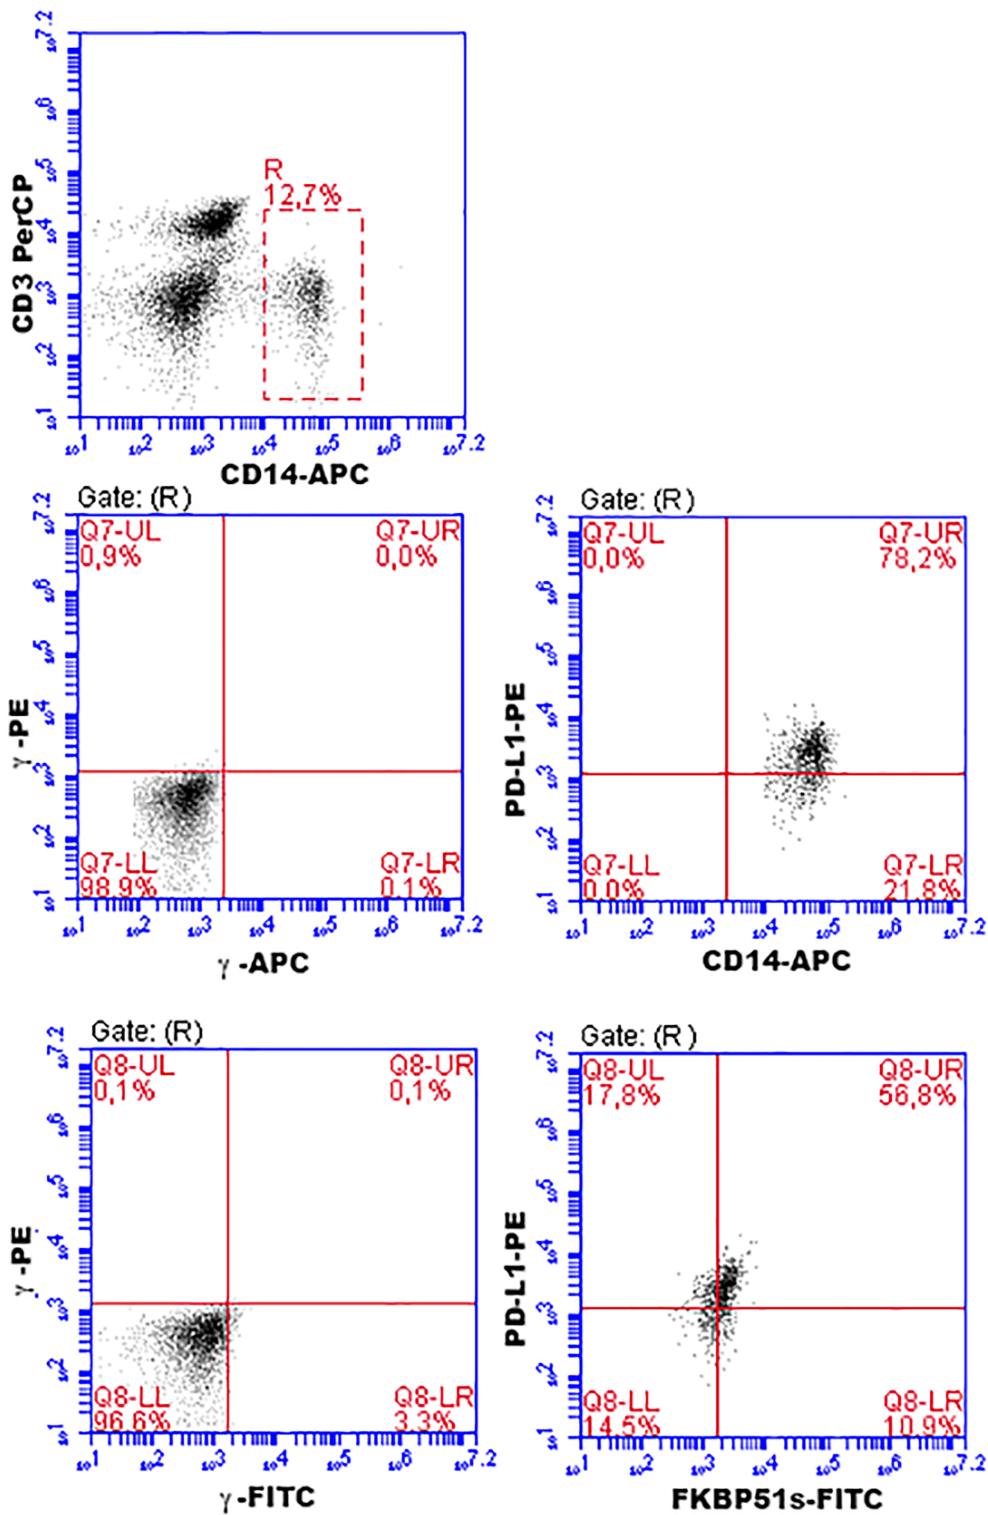

Supplementary figure 3

**Supplementary figure 3.** *PD-L1/FKBP51s* monocyte measurements. PBMCs were CD14/CD3 plotted and a gate was placed on CD14 monocytes. The percentage of PD-L1/FKBP51s cells was calculated on gated monocytes (UR value of FKBP51s plot).

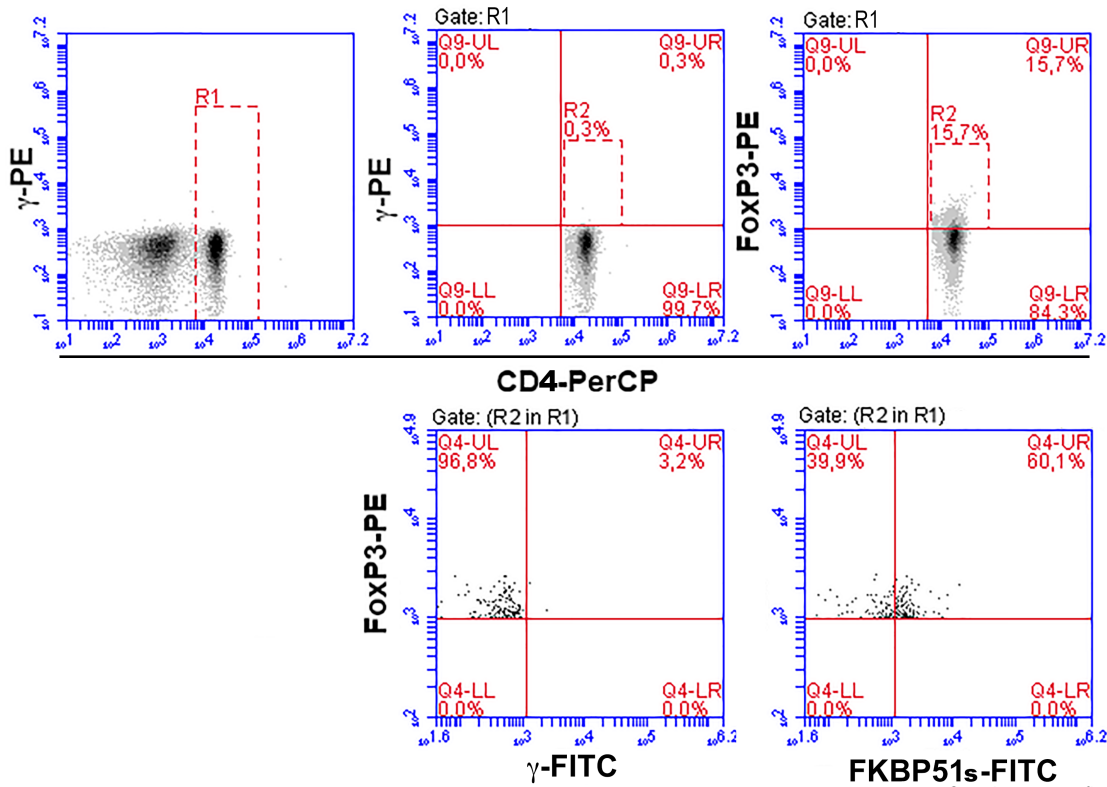

**Supplementary figure 4.** *FKBP51s* Treg measurements. CD4 gated lymphocytes (R1) were plotted as CD4 versus Foxp3 and the CD4/Foxp3 percentage (R2 value) calculated. Then, R2 gated cells were plotted to measure the proportion of *FKBP51s*<sup>pos</sup> cells (value in UR quadrant, *FKBP51s*/Foxp3 plot). The percentage of *FKBP51s* Tregs was calculated as follows: R2 value (CD4/Foxp3 plot) × UR value (*FKBP51s* plot) / 100.

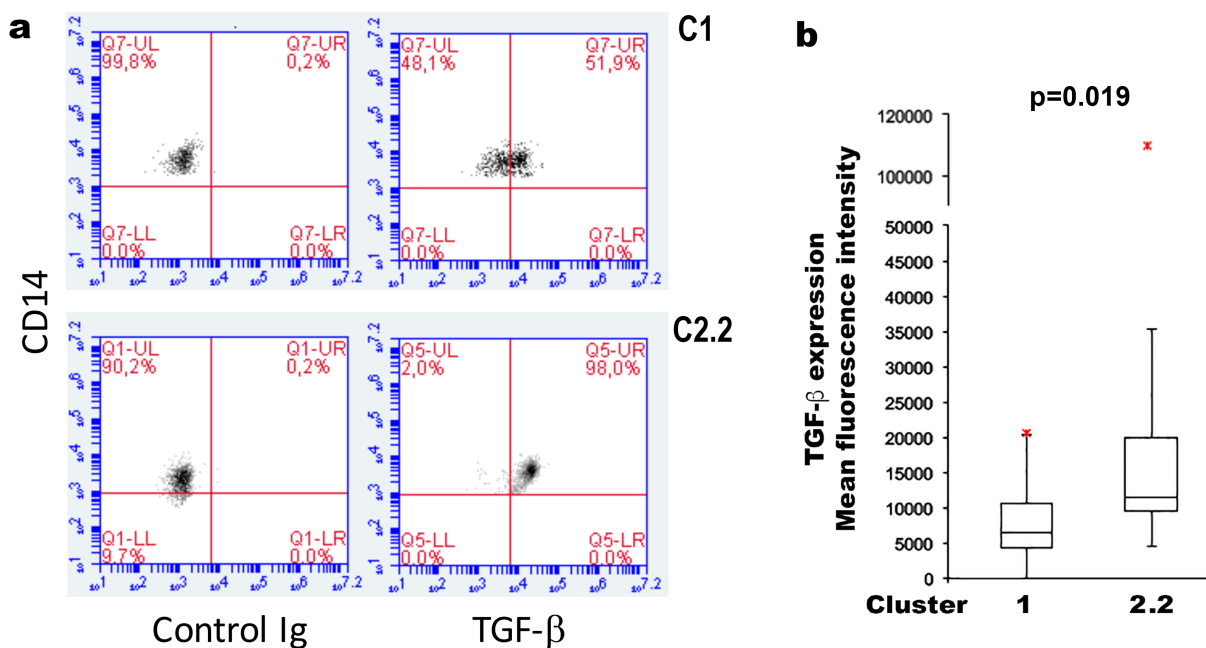

Supplementary figure 5

**Supplementary figure 5.** *Increased levels of TGF- $\beta$  in cases clustered in C2.2.* Expression of TGF- $\beta$  was measured by flow cytometry in cases clustered as C1 (n = 20) and cases clustered as C2.2 (n = 10). **a**, Representative flow cytometry histograms are shown. **b**, Box plots of the mean fluorescence intensity values of TGF- $\beta$  expression.

**Supplementary table 1.** Patient profiles.

| Sex  | Age (y)     | Primary lesion | Mutation | Sites of metastasis   | Stage  |
|------|-------------|----------------|----------|-----------------------|--------|
| F 49 | Mean 56     | Cutaneous 101  | BRAF 35  | Lung 58               | IIIc 2 |
| M 69 | Range 31-84 | Ocular 9       | NRAS 3   | Liver 33              | IV 116 |
|      |             | Mucosal 6      | GNAQ 1   | Lymph node 29         |        |
|      |             | Unknown 2      |          | Cutis and Subcutis 29 |        |
|      |             |                |          | Brain 27              |        |
|      |             |                |          | Bone 9                |        |
|      |             |                |          | Stomach 2             |        |
|      |             |                |          | Gut 2                 |        |
|      |             |                |          | Spleen 1              |        |
|      |             |                |          | Kidney 1              |        |

**Supplementary table 2.** Cluster distribution of NR and R, with reference to FKBP51sTreg status.

| C1 n=33   |        |          |       |
|-----------|--------|----------|-------|
| High n=17 |        | Low n=16 |       |
| NR n=7    | R n=10 | NR n=15  | R n=1 |
| C2.1 n=4  |        |          |       |
| High n=4  |        | Low n=0  |       |
| NR n=2    | R n=2  | NR n=0   | R n=0 |
| C2.2 n=10 |        |          |       |
| High n=6  |        | Low n=4  |       |
| NR n=6    | R n=0  | NR n=3   | R n=1 |
| C3 n=17   |        |          |       |

| High n=10  |        | Low n=7  |       |
|------------|--------|----------|-------|
| NR n=6     | R n=4  | NR n=7   | R n=0 |
| Total n=64 |        |          |       |
| High n=37  |        | Low n=27 |       |
| NR n=21    | R n=16 | NR n=25  | R n=2 |

\*High: FKBP51s Treg >1.02

\*\*Low: FKBP51s Treg ≤1.02

**Supplementary table 3.** Response to nivolumab (n = 16 patients).

|                   | *High n=7 |          | **Low n=9 |          |
|-------------------|-----------|----------|-----------|----------|
|                   | NR        | R        | NR        | R        |
| <b>C1 n=8</b>     | <b>1</b>  | <b>2</b> | <b>5</b>  | <b>0</b> |
| <b>C2.2 n=4</b>   | <b>0</b>  | <b>2</b> | <b>1</b>  | <b>1</b> |
| <b>C3 n=4</b>     | <b>1</b>  | <b>1</b> | <b>2</b>  | <b>0</b> |
| <b>TOTAL n=16</b> | <b>2</b>  | <b>5</b> | <b>8</b>  | <b>1</b> |

\*High: FKBP51s Treg >1.02

\*\*Low: FKBP51s Treg ≤1.02
